# Supplementary material
Source: PubMed Central journal article supplement (PMC2876558)
Supplement: supp_78_6_2754__1.pdf [file supp_78_6_2754__1.pdf]

**Table S1.** Genes upregulated in  $\Omega$ CvfA compared to the wild type control

| Locus <sup>1</sup> | Gene <sup>2</sup> | Gene product <sup>2</sup>                                     | COG <sup>3</sup> | Fold change <sup>4</sup> |
|--------------------|-------------------|---------------------------------------------------------------|------------------|--------------------------|
| SPy0019            | -                 | putative secreted protein                                     | R                | 2.32                     |
| SPy0020            | <i>prsA.2</i>     | putative ribose-phosphate pyrophosphokinase                   | F                | 3.30                     |
| SPy0022            | <i>plsX</i>       | putative fatty acid/phospholipid synthesis protein            | I                | 2.46                     |
| SPy0028            | <i>purN</i>       | Phosphoribosylglycinamide formyltransferase                   | F                | 3.56                     |
| SPy0049            | <i>rplC</i>       | 50S ribosomal protein L3                                      | J                | 2.18                     |
| SPy0050            | <i>rplD</i>       | 50S ribosomal protein L4                                      | J                | 2.49                     |
| SPy0052            | <i>rplB</i>       | 50S ribosomal protein L2                                      | J                | 2.02                     |
| SPy0057            | <i>rplP</i>       | 50S ribosomal protein L16                                     | J                | 2.11                     |
| SPy0060            | <i>rpsQ</i>       | 30S ribosomal protein S17                                     | J                | 2.10                     |
| SPy0061            | -                 | 50S ribosomal protein L14                                     | J                | 2.69                     |
| SPy0062            | <i>rplX</i>       | 50S ribosomal protein L24                                     | J                | 2.34                     |
| SPy0065            | <i>rpsH</i>       | 30S ribosomal protein S8                                      | J                | 2.55                     |
| SPy0066            | <i>rplF</i>       | 50S ribosomal protein L6                                      | J                | 3.94                     |
| SPy0067            | <i>rplR</i>       | 50S ribosomal protein L18                                     | J                | 3.89                     |
| SPy0069            | <i>rpsE</i>       | 30S ribosomal protein S5                                      | J                | 2.85                     |
| SPy0094            | <i>adcb</i>       | putative ABC transporter (permease)                           | P                | 3.70                     |
| SPy0097            | <i>pbp1b</i>      | putative penicillin-binding protein 1b                        | M                | 2.72                     |
| SPy0098            | <i>rpoB</i>       | putative DNA-dependent RNA polymerase subunit beta            | K                | 3.22                     |
| SPy0099            | <i>rpoC</i>       | DNA-dependent RNA polymerase, B' subunit                      | K                | 3.15                     |
| SPy0112            | <i>proC</i>       | putative pyrroline carboxylate reductase                      | E                | 2.43                     |
| SPy0144            | -                 | conserved hypothetical protein                                | S                | 2.82                     |
| SPy0146            | -                 | putative regulatory protein                                   | G                | 2.28                     |
| SPy0149            | <i>ntpK</i>       | putative V-type Na <sup>+</sup> -ATPase subunit K             | C                | 2.50                     |
| SPy0150            | <i>ntpE</i>       | putative V-type Na <sup>+</sup> -ATPase subunit E             | -                | 2.38                     |
| SPy0151            | <i>ntpC</i>       | putative V-type Na <sup>+</sup> -ATPase subunit C             | C                | 2.69                     |
| SPy0154            | <i>ntpA</i>       | putative V-type Na <sup>+</sup> -ATPase alpha subunit         | C                | 2.58                     |
| SPy0155            | <i>ntpB</i>       | putative V-type Na <sup>+</sup> -ATPase subunit B             | C                | 3.20                     |
| SPy0157            | <i>ntpD</i>       | putative V-type Na <sup>+</sup> -ATPase subunit D             | C                | 3.78                     |
| SPy0158            | -                 | putative toxic anion resistance protein                       | P                | 3.64                     |
| SPy0165            | <i>nga/spn</i>    | nicotine adenine dinucleotide glycohydrolase precursor        | -                | 2.43                     |
| SPy0166            | -                 | hypothetical protein                                          | -                | 2.02                     |
| SPy0167            | <i>slo</i>        | streptolysin O precursor                                      | -                | 3.82                     |
| SPy0174            | -                 | conserved hypothetical protein                                | S                | 3.58                     |
| SPy0175            | -                 | conserved hypothetical protein                                | G                | 2.27                     |
| SPy0176            | -                 | conserved hypothetical protein                                | G                | 2.70                     |
| SPy0177            | -                 | putative hexulose-6-phosphate synthase                        | G                | 6.06                     |
| SPy0178            | -                 | putative hexulose-6-phosphate isomerase                       | G                | 3.95                     |
| SPy0179            | <i>araD</i>       | putative L-ribulose 5-phosphate 4-epimerase                   | G                | 2.73                     |
| SPy0182            | -                 | conserved hypothetical protein                                | R                | 3.60                     |
| SPy0195            | -                 | conserved hypothetical protein                                | L                | 2.54                     |
| SPy0212            | <i>speG</i>       | exotoxin G precursor                                          | -                | 6.24                     |
| SPy0215            | <i>pgi</i>        | glucose-6-phosphate isomerase                                 | G                | 6.88                     |
| SPy0224            | <i>hasC.2</i>     | putative UDP-glucose pyrophosphorylase                        | M                | 2.12                     |
| SPy0226            | <i>gpsA</i>       | putative NAD(P)H-dependent glycerol-3-phosphate dehydrogenase | C                | 3.38                     |
| SPy0247            | -                 | conserved hypothetical protein                                | U                | 2.05                     |
| SPy0269            | <i>prgA</i>       | putative surface exclusion protein                            | -                | 2.30                     |
| SPy0272            | <i>rpsG</i>       | 30S ribosomal protein S7                                      | J                | 2.20                     |
| SPy0273            | <i>fus</i>        | translation elongation factor G, EF-G                         | J                | 2.62                     |
| SPy0280            | <i>bacA</i>       | putative undecaprenol kinase (bacitracin resistance protein)  | V                | 4.22                     |
| SPy0319            | -                 | conserved hypothetical protein                                | P                | 2.14                     |
| SPy0320            | -                 | putative ABC transporter (ATP-binding protein)h               | P                | 2.47                     |
| SPy0321            | -                 | putative ABC transporter (permease protein)                   | P                | 3.45                     |

|         |               |                                                                  |   |      |
|---------|---------------|------------------------------------------------------------------|---|------|
| SPy0324 | -             | putative sodium/dicarboxylate symporter                          | E | 2.13 |
| SPy0326 | -             | conserved hypothetical protein                                   | P | 2.53 |
| SPy0373 | -             | conserved hypothetical protein                                   | S | 2.62 |
| SPy0378 | <i>hlyX</i>   | putative hemolysin                                               | R | 3.76 |
| SPy0407 | -             | hypothetical protein                                             | - | 7.36 |
| SPy0408 | -             | hypothetical protein (similar to Human CGI-32 protein)           | P | 2.06 |
| SPy0412 | <i>exoA</i>   | putative 3'-exo-deoxyribonuclease                                | L | 2.24 |
| SPy0414 | <i>lctO</i>   | putative lactate oxidase                                         | C | 2.56 |
| SPy0416 | <i>prtS</i>   | putative cell envelope proteinase                                | O | 2.21 |
| SPy0427 | <i>nrdE.1</i> | ribonucleoside-diphosphate reductase, large chain                | F | 2.23 |
| SPy0444 | -             | conserved hypothetical protein                                   | L | 2.17 |
| SPy0457 | -             | putative cyclophilin-type protein                                | O | 3.00 |
| SPy0458 | -             | conserved hypothetical protein                                   | D | 2.47 |
| SPy0460 | <i>rplK</i>   | 50S ribosomal protein L11                                        | J | 2.29 |
| SPy0492 | -             | hypothetical protein                                             | - | 2.12 |
| SPy0511 | <i>gloA</i>   | putative lactoylglutathione lyase                                | E | 5.08 |
| SPy0512 | -             | putative NAD(P)H-flavin oxidoreductase                           | C | 3.53 |
| SPy0513 | <i>pepQ</i>   | putative XAA-PRO dipeptidase; X-PRO dipeptidase                  | E | 3.49 |
| SPy0517 | <i>thrS</i>   | putative threonyl-tRNA synthetase 1                              | J | 9.16 |
| SPy0530 | <i>vicX</i>   | conserved hypothetical protein                                   | R | 4.34 |
| SPy0568 | -             | conserved hypothetical protein                                   | R | 2.18 |
| SPy0569 | <i>ftsY</i>   | putative signal recognition particle (docking protein)           | U | 4.90 |
| SPy0591 | -             | putative protease                                                | O | 2.63 |
| SPy0595 | <i>lysS</i>   | putative lysyl-tRNA synthetase                                   | J | 2.24 |
| SPy0603 | -             | hypothetical protein                                             | - | 2.06 |
| SPy0605 | <i>bsaA</i>   | putative glutathione peroxidase                                  | O | 2.89 |
| SPy0606 | <i>pepF</i>   | putative oligopeptidase                                          | E | 3.96 |
| SPy0611 | <i>tufA</i>   | putative translation elongation factor EF-Tu                     | J | 3.88 |
| SPy0621 | -             | conserved hypothetical protein                                   | R | 3.32 |
| SPy0627 | <i>regR</i>   | putative transcriptional regulator (LacI family)                 | K | 3.79 |
| SPy0630 | <i>agaW</i>   | putative PTS dependent N-acetyl-galactosamine-IIC component      | G | 2.21 |
| SPy0714 | <i>adcA</i>   | putative adhesion protein                                        | R | 2.87 |
| SPy0731 | <i>eno</i>    | putative enolase                                                 | G | 2.68 |
| SPy0752 | -             | conserved hypothetical protein                                   | I | 2.38 |
| SPy0770 | -             | hypothetical protein                                             | - | 2.08 |
| SPy0803 | <i>cmk</i>    | putative cytidylate kinase                                       | F | 2.71 |
| SPy0813 | <i>gor</i>    | putative glutathione reductase (GR)                              | C | 2.11 |
| SPy0822 | <i>rpmA</i>   | 50S ribosomal protein L27                                        | J | 2.31 |
| SPy0857 | <i>mur1.2</i> | putative peptidoglycan hydrolase                                 | N | 2.00 |
| SPy0913 | -             | putative ribosomal protein S1-like DNA-binding protein           | J | 2.03 |
| SPy0919 | -             | hypothetical protein                                             | - | 3.94 |
| SPy0936 | <i>cpsFQ</i>  | putative dTDP-glucose-4,6-dehydratase                            | M | 3.14 |
| SPy1011 | -             | conserved hypothetical protein                                   | R | 3.10 |
| SPy1012 | -             | conserved hypothetical protein                                   | R | 7.08 |
| SPy1020 | -             | conserved hypothetical protein                                   | R | 2.24 |
| SPy1029 | <i>acoC</i>   | putative dihydrolipoamide S-acetyltransferase                    | C | 2.37 |
| SPy1031 | <i>acoL</i>   | putative dihydrolipoamide dehydrogenase, component E3            | C | 4.33 |
| SPy1036 | -             | conserved hypothetical protein                                   | S | 4.95 |
| SPy1037 | -             | conserved hypothetical protein                                   | S | 7.45 |
| SPy1038 | -             | putative phospho-sugar mutase                                    | G | 5.53 |
| SPy1054 | -             | putative collagen-like protein                                   | - | 3.65 |
| SPy1057 | -             | hypothetical protein                                             | G | 2.02 |
| SPy1058 | -             | putative phosphotransferase system (PTS), enzyme II component B  | G | 2.06 |
| SPy1059 | -             | putative phosphotransferase system (PTS), enzyme II, component C | G | 6.22 |
| SPy1060 | -             | putative phosphotransferase system (PTS), enzyme II component D  | G | 6.36 |
| SPy1070 | -             | putative dipeptidase                                             | E | 4.52 |

|         |               |                                                                            |   |      |
|---------|---------------|----------------------------------------------------------------------------|---|------|
| SPy1072 | <i>rplJ</i>   | 50S ribosomal protein L10                                                  | J | 2.52 |
| SPy1073 | <i>rplL</i>   | 50S ribosomal protein L7/L12                                               | J | 4.24 |
| SPy1093 | -             | putative D,D-carboxypeptidase, penicillin-binding protein                  | M | 2.56 |
| SPy1106 | -             | putative two-component response regulator                                  | K | 2.18 |
| SPy1109 | <i>malP</i>   | putative L-malate permease                                                 | C | 3.41 |
| SPy1128 | <i>pta</i>    | putative phosphotransacetylase                                             | C | 2.00 |
| SPy1151 | <i>ldh</i>    | putative L-lactate dehydrogenase                                           | C | 2.21 |
| SPy1190 | <i>citX</i>   | conserved hypothetical protein                                             | H | 4.44 |
| SPy1191 | <i>oadA</i>   | putative oxaloacetate decarboxylase alpha chain                            | C | 3.74 |
| SPy1228 | -             | putative lipoprotein                                                       | R | 2.31 |
| SPy1230 | <i>cdd</i>    | putative cytidine deaminase                                                | F | 3.30 |
| SPy1247 | -             | putative myo-inositol-1(or 4)-monophosphatase                              | G | 2.09 |
| SPy1250 | <i>mreA</i>   | putative macrolide-efflux protein                                          | H | 2.63 |
| SPy1273 | <i>cfa</i>    | CAMP factor                                                                | - | 5.29 |
| SPy1282 | <i>pyk</i>    | putative pyruvate kinase                                                   | G | 2.45 |
| SPy1283 | <i>pfk</i>    | putative 6-phosphofructokinase                                             | G | 2.28 |
| SPy1316 | -             | putative ABC transporter (ATP-binding protein)                             | E | 4.32 |
| SPy1344 | -             | conserved hypothetical protein                                             | Q | 3.59 |
| SPy1346 | -             | putative RNA methyltransferase                                             | J | 2.05 |
| SPy1359 | <i>metK</i>   | S-adenosylmethionine synthetase                                            | H | 2.61 |
| SPy1370 | -             | putative deacetylase                                                       | G | 3.77 |
| SPy1402 | -             | hypothetical protein                                                       | - | 2.56 |
| SPy1410 | -             | putative 1-acylglycerol-3-phosphate O-acyltransferase                      | I | 2.01 |
| SPy1425 | -             | hypothetical protein                                                       | - | 3.75 |
| SPy1427 | -             | putative transcriptional regulator                                         | R | 5.22 |
| SPy1429 | <i>gpmA</i>   | putative phosphoglycerate mutase                                           | G | 2.90 |
| SPy1489 | <i>hlpA</i>   | histone-like DNA-binding protein                                           | L | 4.29 |
| SPy1494 | -             | hypothetical protein                                                       | - | 3.27 |
| SPy1510 | <i>mutT</i>   | putative mutator protein                                                   | L | 2.80 |
| SPy1513 | <i>ileS</i>   | putative isoleucyl-tRNA synthetase                                         | J | 4.51 |
| SPy1527 | -             | putative GTP-binding protein TypA/BipA (tyrosine phosphorylated protein A) | T | 2.19 |
| SPy1528 | -             | conserved hypothetical protein                                             | P | 2.74 |
| SPy1529 | <i>glcK</i>   | glucose kinase                                                             | K | 2.56 |
| SPy1541 | <i>arcC</i>   | putative carbamate kinase                                                  | E | 5.54 |
| SPy1542 | -             | putative Xaa-His dipeptidase                                               | E | 4.93 |
| SPy1543 | -             | conserved hypothetical protein                                             | S | 2.98 |
| SPy1544 | <i>arcB</i>   | putative ornithine transcarbamylase                                        | E | 5.69 |
| SPy1546 | -             | hypothetical protein                                                       | K | 4.84 |
| SPy1547 | <i>sagP</i>   | streptococcal antitumor protein (possible arginine deiminase)              | E | 2.14 |
| SPy1568 | <i>valS</i>   | putative valine-tRNA ligase                                                | J | 3.30 |
| SPy1569 | -             | hypothetical protein                                                       | - | 2.43 |
| SPy1605 | -             | putative two-component responsible histidine kinase                        | T | 2.20 |
| SPy1638 | <i>atoD.1</i> | putative Acetyl-CoA:acetoacetyl-CoA transferase A subunit                  | I | 2.13 |
| SPy1639 | <i>atoA</i>   | putative Acetyl-CoA:acetoacetyl-CoA transferase b subunit                  | I | 3.18 |
| SPy1640 | -             | putative oxidoreductase                                                    | Q | 3.04 |
| SPy1643 | -             | hypothetical protein                                                       | - | 5.04 |
| SPy1644 | -             | conserved hypothetical protein                                             | L | 5.69 |
| SPy1646 | -             | conserved hypothetical protein                                             | D | 5.34 |
| SPy1651 | <i>pepC</i>   | putative cysteine aminopeptidase C                                         | E | 2.27 |
| SPy1652 | <i>nadE</i>   | putative NAD <sup>+</sup> synthase                                         | H | 2.23 |
| SPy1654 | <i>aapA</i>   | putative amino acid permease                                               | E | 2.25 |
| SPy1676 | <i>tkt</i>    | putative transketolase                                                     | G | 5.63 |
| SPy1678 | -             | putative transaldolase                                                     | G | 3.09 |
| SPy1700 | -             | conserved hypothetical protein                                             | R | 2.54 |
| SPy1737 | -             | conserved hypothetical protein                                             | R | 2.98 |
| SPy1739 | <i>manM</i>   | putative mannose-specific phosphotransferase system component IIC          | G | 3.24 |

|         |              |                                                                      |   |       |
|---------|--------------|----------------------------------------------------------------------|---|-------|
| SPy1740 | <i>manN</i>  | putative mannose-specific phosphotransferase system component IID    | G | 4.95  |
| SPy1742 | <i>serS</i>  | putative seryl-tRNA synthetase                                       | J | 2.40  |
| SPy1743 | <i>accA</i>  | putative acetyl-CoA carboxylase alpha subunit                        | I | 2.81  |
| SPy1782 | <i>asnB</i>  | putative L-asparaginase                                              | E | 5.31  |
| SPy1805 | <i>secA</i>  | putative preprotein translocase binding subunit (ATPase)             | U | 2.69  |
| SPy1823 | <i>comEB</i> | putative late competence protein required for DNA binding            | F | 3.29  |
| SPy1824 | <i>pepP</i>  | putative aminopeptidase P; XAA-pro aminopeptidase                    | E | 5.96  |
| SPy1825 | <i>uvrA</i>  | putative excinuclease ABC (subunit A)                                | L | 2.53  |
| SPy1841 | -            | putative ribonuclease HIII                                           | L | 2.98  |
| SPy1842 | <i>spi</i>   | putative signal peptidase I                                          | U | 2.31  |
| SPy1844 | -            | putative exodeoxyribonuclease V (alpha subunit)                      | L | 3.74  |
| SPy1846 | <i>dinP</i>  | putative DNA-damage-inducible protein P                              | L | 3.74  |
| SPy1849 | <i>pfl</i>   | putative pyruvate formate-lyase                                      | C | 2.75  |
| SPy1858 | <i>pepXP</i> | putative X-Pro dipeptidyl-peptidase IV                               | - | 2.39  |
| SPy1861 | -            | putative repressor                                                   | K | 2.01  |
| SPy1862 | -            | conserved hypothetical protein                                       | S | 2.25  |
| SPy1863 | -            | putative transcriptional activator regulator protein                 | K | 3.21  |
| SPy1864 | <i>dnaQ</i>  | putative DNA polymerase III epsilon subunit                          | L | 2.21  |
| SPy1866 | -            | conserved hypothetical protein                                       | R | 3.98  |
| SPy1871 | <i>rpsN2</i> | 30S ribosomal protein S14                                            | J | 18.13 |
| SPy1877 | <i>glnA</i>  | putative glutamine synthetase                                        | E | 2.59  |
| SPy1896 | <i>ropA</i>  | transcription regulator - (trigger factor (prolyl isomerase))        | O | 2.48  |
| SPy1906 | <i>hsdM</i>  | putative type I site-specific deoxyribonuclease                      | V | 2.45  |
| SPy1931 | <i>rpsI</i>  | ribosomal protein S9                                                 | J | 2.25  |
| SPy1932 | <i>rplM</i>  | 50S ribosomal protein L13                                            | J | 3.58  |
| SPy1934 | -            | putative transcription regulator                                     | K | 3.41  |
| SPy1955 | <i>rpsO</i>  | 30S ribosomal protein S15                                            | J | 2.90  |
| SPy1962 | <i>proS</i>  | putative prolyl-tRNA synthetase                                      | J | 5.38  |
| SPy1964 | <i>cdsA</i>  | putative phosphatidate cytidyltransferase (CDP-diglyceride synthase) | I | 2.66  |
| SPy1972 | <i>pulA</i>  | putative pullulanase                                                 | G | 2.34  |
| SPy1979 | <i>ska</i>   | streptokinase A precursor                                            | - | 9.28  |
| SPy1980 | -            | conserved hypothetical protein                                       | J | 2.66  |
| SPy1981 | <i>relA</i>  | (p)ppGpp synthetase                                                  | T | 3.16  |
| SPy1992 | -            | conserved hypothetical protein                                       | L | 2.48  |
| SPy2018 | <i>emm1</i>  | M protein type 1                                                     | - | 3.74  |
| SPy2034 | -            | conserved hypothetical protein                                       | - | 2.18  |
| SPy2045 | -            | protein low temperature requirement C                                | I | 2.41  |
| SPy2047 | <i>gldA</i>  | putative glycerol dehydrogenase                                      | C | 2.80  |
| SPy2059 | <i>pbp2A</i> | penicillin-binding protein 2a                                        | M | 3.47  |
| SPy2088 | -            | putative cationic amino acid transporter protein                     | E | 2.96  |
| SPy2091 | -            | putative regulatory protein                                          | R | 6.21  |
| SPy2092 | <i>rpsB</i>  | 30S ribosomal protein S2                                             | J | 12.19 |
| SPy2093 | <i>tsf</i>   | putative elongation factor TS                                        | J | 16.54 |
| SPy2095 | <i>pepO</i>  | putative endopeptidase O                                             | O | 3.77  |
| SPy2097 | -            | putative PTS system enzyme II                                        | G | 2.58  |
| SPy2111 | -            | hypothetical protein                                                 | - | 2.91  |
| SPy2119 | <i>ruvA</i>  | putative Holiday junction DNA helicase                               | L | 2.12  |
| SPy2151 | <i>argS</i>  | putative arginyl-tRNA synthetase                                     | J | 2.91  |
| SPy2156 | <i>aspS</i>  | putative aspartyl-tRNA synthetase                                    | J | 2.96  |
| SPy2188 | -            | putative tRNA-(5-methylaminomethyl-2-thiouridylate)                  | J | 2.64  |
| SPy2189 | <i>sdhB</i>  | putative L-serine dehydratase beta subunit                           | E | 2.16  |
| SPy2190 | <i>sdhA</i>  | putative L-serine dehydratase alpha subunit                          | E | 8.41  |
| SPy2191 | -            | hypothetical protein                                                 | - | 2.11  |
| SPy2206 | <i>guaB</i>  | inosine monophosphate dehydrogenase                                  | R | 3.20  |
| SPy2216 | <i>htrA</i>  | putative serine protease                                             | O | 3.35  |

<sup>1</sup>SPy numbers are assigned based on genome of serotype M1 GAS strain SF370.

<sup>2</sup>Assignment based on annotation of serotype M1 GAS strain SF370 ORFs  
(<http://www.ncbi.nlm.nih.gov/genomes/altik.cgi?gi=178&db=Genome>).

<sup>3</sup>Cluster of Orthologous Groups (<http://www.ncbi.nlm.nih.gov/sutils/coxik.cgi?gi=178>)

<sup>4</sup>Average of a data set consisting of 18 total microarray hybridizations with 2 independently prepared RNA samples.  
The values here fulfilled the following criteria: the estimated false discovery rate at the 90th percentile in SAM  
(Significance Analysis of Microarrays) analysis was  $\leq 0.1\%$ , and the fold-change value was at least  $\pm 2.0$ .
