# Supplementary material
Source: PubMed Central journal article supplement (PMC2876558)
Supplement: supp_78_6_2754__2.pdf [file supp_78_6_2754__2.pdf]

**Table S2.** Genes downregulated in  $\Omega$ CvfA compared to the wild type control

| Locus <sup>1</sup> | Gene <sup>2</sup> | Gene product <sup>2</sup>                                                                               | COG <sup>3</sup> | Fold change <sup>4</sup> |
|--------------------|-------------------|---------------------------------------------------------------------------------------------------------|------------------|--------------------------|
| SPy0003            | <i>dnaN</i>       | beta subunit of DNA polymerase III                                                                      | L                | -2.08                    |
| SPy0013            | -                 | putative cell-cycle protein                                                                             | D                | -2.38                    |
| SPy0074            | <i>adk</i>        | adenylate kinase                                                                                        | F                | -2.73                    |
| SPy0075            | <i>infA</i>       | putative translation initiation factor IF-1                                                             | J                | -3.59                    |
| SPy0076            | <i>rpmJ</i>       | 50S ribosomal protein B                                                                                 | J                | -3.34                    |
| SPy0077            | <i>rpsM</i>       | 30S ribosomal protein S13                                                                               | J                | -2.96                    |
| SPy0078            | <i>rpsK</i>       | 30S ribosomal protein S11                                                                               | J                | -2.07                    |
| SPy0080            | <i>rpoA</i>       | DNA-directed RNA polymerase alpha subunit                                                               | K                | -2.71                    |
| SPy0116            | -                 | hypothetical protein                                                                                    | -                | -4.86                    |
| SPy0185            | <i>polA</i>       | DNA-directed DNA polymerase I                                                                           | L                | -3.73                    |
| SPy0186            | -                 | conserved hypothetical protein                                                                          | R                | -2.08                    |
| SPy0187            | <i>spf</i>        | Ferric transport regulator protein                                                                      | P                | -2.24                    |
| SPy0198            | -                 | putative transposase, IS861                                                                             | L                | -9.84                    |
| SPy0227            | -                 | hypothetical protein                                                                                    | -                | -5.26                    |
| SPy0233            | -                 | conserved hypothetical protein                                                                          | S                | -2.42                    |
| SPy0242            | -                 | putative histidine kinase, possibly involved in competence                                              | T                | -2.17                    |
| SPy0246            | <i>rnpA</i>       | putative ribonuclease P protein component                                                               | J                | -3.02                    |
| SPy0250            | <i>rpmH</i>       | 50S ribosomal protein L34                                                                               | J                | -2.10                    |
| SPy0258            | -                 | putative glucose kinase                                                                                 | K                | -2.23                    |
| SPy0285            | -                 | putative ABC transporter (ATP-binding protein)                                                          | O                | -2.00                    |
| SPy0330            | <i>lemA</i>       | putative cytoplasmic membrane protein                                                                   | S                | -3.31                    |
| SPy0340            | <i>dnaI</i>       | putative primosome component (helicase loader)                                                          | L                | -3.42                    |
| SPy0342            | <i>snf</i>        | putative SNF helicase                                                                                   | K                | -3.79                    |
| SPy0343            | -                 | hypothetical protein                                                                                    | -                | -3.10                    |
| SPy0364            | -                 | conserved hypothetical protein                                                                          | R                | -2.10                    |
| SPy0370            | -                 | conserved hypothetical protein                                                                          | S                | -2.03                    |
| SPy0476            | <i>era</i>        | GTP-binding protein (GTPase)                                                                            | R                | -3.84                    |
| SPy0477            | -                 | conserved hypothetical protein                                                                          | L                | -2.25                    |
| SPy0501            | -                 | putative multi-drug resistance efflux pump                                                              | G                | -2.08                    |
| SPy0502            | -                 | hypothetical protein                                                                                    | U                | -4.79                    |
| SPy0521            | -                 | conserved hypothetical protein                                                                          | R                | -2.42                    |
| SPy0559            | -                 | hypothetical protein                                                                                    | J                | -3.61                    |
| SPy0560            | -                 | conserved hypothetical protein                                                                          | I                | -3.45                    |
| SPy0581            | -                 | conserved hypothetical protein                                                                          | S                | -3.69                    |
| SPy0596            | -                 | conserved hypothetical protein                                                                          | R                | -4.51                    |
| SPy0599            | -                 | putative transcription regulator                                                                        | S                | -2.76                    |
| SPy0622            | -                 | hypothetical protein                                                                                    | -                | -2.42                    |
| SPy0653            | -                 | conserved hypothetical protein                                                                          | S                | -2.34                    |
| SPy0721            | -                 | putative flavodoxin                                                                                     | C                | -3.21                    |
| SPy0738            | <i>sagA</i>       | streptolysin S associated protein                                                                       | -                | -4.36                    |
| SPy0739            | <i>sagB</i>       | streptolysin S associated ORF                                                                           | C                | -2.92                    |
| SPy0740            | <i>sagC</i>       | streptolysin S associated ORF                                                                           | -                | -2.72                    |
| SPy0741            | <i>sagD</i>       | hypothetical protein                                                                                    | -                | -2.83                    |
| SPy0742            | <i>sagE</i>       | hypothetical protein                                                                                    | R                | -3.06                    |
| SPy0743            | <i>sagF</i>       | hypothetical protein                                                                                    | -                | -3.30                    |
| SPy0744            | <i>sagG</i>       | putative ABC transporter (ATP-binding protein)                                                          | V                | -4.50                    |
| SPy0745            | <i>sagH</i>       | ABC transporter (ATP-binding protein) - streptolysin S associated ORF                                   | V                | -2.75                    |
| SPy0757            | <i>atpH</i>       | putative proton-translocating ATPase, delta subunit                                                     | C                | -2.18                    |
| SPy0761            | <i>atpC</i>       | putative proton-translocating ATPase, epsilon subunit                                                   | C                | -2.11                    |
| SPy0778            | -                 | putative ABC transporter (substrate-binding protein)                                                    | E                | -2.17                    |
| SPy0779            | <i>rpsU</i>       | 30S ribosomal protein S21                                                                               | J                | -2.92                    |
| SPy0780            | <i>mscL</i>       | putative large conductance mechanosensitive channel                                                     | M                | -2.38                    |
| SPy0792            | <i>rgpFc</i>      | possibly involved in cell wall localization and side chain formation of rhamnose-glucose polysaccharide | M                | -2.21                    |
| SPy0793            | -                 | conserved hypothetical protein                                                                          | M                | -3.10                    |
| SPy0797            | -                 | conserved hypothetical protein                                                                          | R                | -3.05                    |
| SPy0806            | <i>rplT</i>       | 50S ribosomal protein L20                                                                               | J                | -2.22                    |
| SPy0830            | <i>pyrR</i>       | putative pyrimidine regulatory protein                                                                  | F                | -2.21                    |

|         |               |                                                                             |   |        |
|---------|---------------|-----------------------------------------------------------------------------|---|--------|
| SPy0831 | <i>pyrP</i>   | putative uracil permease                                                    | F | -3.65  |
| SPy0832 | <i>pyrB</i>   | putative aspartate transcarbamoylase                                        | F | -3.62  |
| SPy0833 | <i>carA</i>   | putative carbamoyl phosphate synthetase small subunit                       | E | -3.43  |
| SPy0835 | <i>carB</i>   | putative carbamoylphosphate synthetase                                      | E | -4.12  |
| SPy0840 | <i>rpsP</i>   | 30S ribosomal protein S16                                                   | J | -3.88  |
| SPy0841 | -             | conserved hypothetical protein                                              | R | -3.77  |
| SPy0845 | <i>czcD</i>   | putative cation-efflux system membrane protein                              | P | -8.00  |
| SPy0846 | -             | conserved hypothetical protein                                              | K | -3.28  |
| SPy0870 | <i>fms</i>    | putative polypeptide deformylase                                            | J | -3.66  |
| SPy0885 | <i>clpX</i>   | putative ATP-dependent Clp protease subunit X                               | O | -2.25  |
| SPy0887 | -             | hypothetical protein                                                        | - | -3.86  |
| SPy0895 | -             | histidine protein kinase                                                    | - | -2.32  |
| SPy0912 | -             | hypothetical protein                                                        | - | -10.68 |
| SPy0914 | -             | hypothetical protein                                                        | - | -4.11  |
| SPy0921 | <i>miaA</i>   | putative tRNA isopentenylpyrophosphate transferase                          | J | -2.71  |
| SPy0928 | -             | conserved hypothetical protein                                              | L | -2.25  |
| SPy0929 | <i>nth</i>    | putative endonuclease III (DNA repair)                                      | L | -2.19  |
| SPy1010 | <i>mutX</i>   | putative 7,8-dihydro-8-oxoguanine-triphosphatase                            | L | -2.01  |
| SPy1019 | -             | putative ABC transporter (ATP-binding protein)                              | R | -2.89  |
| SPy1024 | -             | hypothetical protein                                                        | - | -2.38  |
| SPy1026 | <i>acoA</i>   | putative acetoin dehydrogenase (TPP-dependent) alpha chain                  | C | -2.32  |
| SPy1056 | -             | conserved hypothetical protein                                              | S | -2.02  |
| SPy1096 | <i>folC.1</i> | putative folyl-polyglutamate synthetase                                     | H | -2.31  |
| SPy1115 | -             | hypothetical protein                                                        | E | -2.81  |
| SPy1117 | -             | hypothetical protein                                                        | R | -2.28  |
| SPy1119 | -             | conserved hypothetical protein                                              | R | -3.88  |
| SPy1140 | <i>tdk2</i>   | putative thymidine kinase                                                   | F | -2.36  |
| SPy1141 | <i>prfA</i>   | putative peptide chain release factor 1                                     | J | -2.11  |
| SPy1142 | <i>hemK</i>   | putative protoporphyrinogen oxidase                                         | J | -3.01  |
| SPy1143 | -             | hypothetical protein                                                        | J | -4.13  |
| SPy1144 | -             | hypothetical protein                                                        | K | -3.24  |
| SPy1147 | -             | conserved hypothetical protein                                              | M | -2.89  |
| SPy1148 | -             | putative ABC transporter (ATP-binding protein)                              | V | -2.43  |
| SPy1156 | -             | hypothetical protein                                                        | - | -2.33  |
| SPy1161 | -             | conserved hypothetical protein                                              | R | -2.98  |
| SPy1162 | <i>mh</i>     | putative ribonuclease HII                                                   | L | -2.27  |
| SPy1164 | <i>topA</i>   | putative DNA topoisomerase I                                                | L | -2.12  |
| SPy1175 | -             | hypothetical protein                                                        | - | -4.13  |
| SPy1179 | -             | putative transcriptional regulator                                          | K | -2.48  |
| SPy1196 | -             | putative integrase/recombinase                                              | L | -5.09  |
| SPy1198 | -             | putative repressor protein                                                  | K | -3.23  |
| SPy1206 | -             | putative ABC transporter (ATP-binding protein)                              | R | -2.88  |
| SPy1209 | <i>pdxK</i>   | putative pyridoxal kinase                                                   | H | -3.70  |
| SPy1215 | -             | hypothetical protein                                                        | K | -2.44  |
| SPy1218 | -             | conserved hypothetical protein                                              | C | -2.69  |
| SPy1219 | -             | putative trimethylamine dehydrogenase                                       | C | -2.35  |
| SPy1220 | -             | conserved hypothetical protein                                              | H | -2.46  |
| SPy1232 | -             | conserved hypothetical protein                                              | J | -4.87  |
| SPy1233 | <i>coaA</i>   | putative pantothenate kinase                                                | H | -4.05  |
| SPy1234 | <i>rpsT</i>   | 30S ribosomal protein S20                                                   | J | -5.10  |
| SPy1237 | -             | putative response regulator                                                 | T | -2.18  |
| SPy1239 | <i>pepN</i>   | putative lysyl-aminopeptidase; aminopeptidase N                             | E | -2.99  |
| SPy1240 | <i>phoU</i>   | putative phosphate uptake regulatory protein                                | P | -2.99  |
| SPy1243 | <i>pstC</i>   | putative phosphate ABC transporter (permease protein)                       | P | -2.40  |
| SPy1251 | <i>truB</i>   | putative tRNA pseudouridine 55 synthase                                     | J | -2.78  |
| SPy1253 | -             | conserved hypothetical protein                                              | S | -4.61  |
| SPy1254 | -             | hypothetical protein                                                        | V | -2.97  |
| SPy1259 | -             | putative transcriptional regulator                                          | K | -2.55  |
| SPy1265 | -             | conserved hypothetical protein                                              | S | -3.80  |
| SPy1274 | -             | putative amino acid ABC transporter, periplasmic amino acid-binding protein | E | -3.39  |
| SPy1277 | -             | conserved hypothetical protein                                              | P | -5.54  |

|         |                |                                                                             |   |        |
|---------|----------------|-----------------------------------------------------------------------------|---|--------|
| SPy1288 | -              | hypothetical protein                                                        | S | -2.35  |
| SPy1289 | -              | hypothetical protein                                                        | S | -2.50  |
| SPy1291 | <i>glgP</i>    | putative glycogen phosphorylase                                             | G | -2.97  |
| SPy1292 | <i>malM</i>    | putative 4-alpha-glucanotransferase                                         | G | -3.84  |
| SPy1293 | <i>malR</i>    | putative maltose operon transcriptional repressor                           | K | -2.82  |
| SPy1294 | -              | putative maltose/maltodextrin-binding protein                               | G | -5.38  |
| SPy1312 | <i>dltA</i>    | putative D-alanine-D-alanyl carrier protein ligase                          | Q | -2.79  |
| SPy1314 | <i>uvrB</i>    | putative excinuclease ABC (subunit B)                                       | L | -2.47  |
| SPy1332 | -              | hypothetical protein                                                        | - | -2.05  |
| SPy1337 | <i>rsuA</i>    | putative 16S pseudouridylate synthase                                       | J | -2.50  |
| SPy1353 | -              | conserved hypothetical protein                                              | S | -2.86  |
| SPy1354 | <i>map</i>     | putative methionine aminopeptidase                                          | J | -3.03  |
| SPy1355 | -              | conserved hypothetical protein                                              | K | -2.11  |
| SPy1364 | <i>dnaX</i>    | DNA polymerase III subunits gamma / tau                                     | L | -2.25  |
| SPy1372 | <i>pstI</i>    | putative phosphoenolpyruvate:sugar phosphotransferase system enzyme I       | G | -3.54  |
| SPy1378 | <i>nrdF.2</i>  | ribonucleotide diphosphate reductase small subunit                          | F | -2.41  |
| SPy1395 | -              | putative transcription factor                                               | R | -2.39  |
| SPy1398 | -              | putative 16S pseudouridylate synthetase                                     | J | -3.86  |
| SPy1399 | <i>nagB</i>    | putative N-acetylglucosamine-6-phosphate isomerase                          | G | -5.61  |
| SPy1406 | <i>sodA</i>    | superoxide dismutase (Fe/Mn)                                                | P | -5.75  |
| SPy1407 | <i>holA</i>    | DNA polymerase III delta subunit                                            | L | -2.02  |
| SPy1508 | -              | hypothetical protein                                                        | S | -5.12  |
| SPy1514 | <i>divIVAS</i> | cell-division initiation protein (septum placement)                         | D | -2.57  |
| SPy1515 | -              | conserved hypothetical protein                                              | S | -2.71  |
| SPy1519 | -              | conserved hypothetical protein                                              | R | -2.62  |
| SPy1520 | <i>ftsZ</i>    | putative cell division protein                                              | D | -3.18  |
| SPy1533 | -              | conserved hypothetical protein                                              | R | -2.15  |
| SPy1534 | -              | hypothetical protein                                                        | S | -2.83  |
| SPy1548 | -              | hypothetical protein                                                        | T | -2.13  |
| SPy1580 | -              | putative acetate kinase                                                     | S | -2.63  |
| SPy1584 | <i>aroE</i>    | putative shikimate 5-dehydrogenase                                          | E | -2.79  |
| SPy1587 | -              | putative two-component sensor response regulator                            | T | -8.06  |
| SPy1588 | -              | putative two-component sensor histidine kinase                              | T | -16.33 |
| SPy1589 | -              | conserved hypothetical protein                                              | - | -17.01 |
| SPy1591 | -              | hypothetical protein                                                        | G | -7.75  |
| SPy1592 | -              | conserved hypothetical protein                                              | G | -8.05  |
| SPy1593 | -              | putative sugar-binding transport protein                                    | G | -5.11  |
| SPy1595 | -              | putative sugar-binding transport protein                                    | G | -8.66  |
| SPy1596 | -              | putative transcriptional regulator                                          | K | -2.97  |
| SPy1602 | -              | putative transcription regulator                                            | K | -2.83  |
| SPy1604 | -              | conserved hypothetical protein                                              | G | -2.20  |
| SPy1619 | -              | putative polyribonucleotide nucleotidyltransferase (general stress protein) | J | -2.03  |
| SPy1628 | <i>fnt</i>     | putative methionyl tRNA formyltransferase                                   | J | -8.40  |
| SPy1633 | -              | conserved hypothetical protein                                              | R | -3.90  |
| SPy1657 | -              | putative amino acid ABC transport system (ATP-binding protein)              | E | -3.07  |
| SPy1666 | -              | conserved hypothetical protein                                              | M | -2.32  |
| SPy1694 | <i>nagA</i>    | putative N-acetylglucosamine-6-phosphate deacetylase                        | G | -2.31  |
| SPy1721 | <i>infB</i>    | putative initiation factor 2                                                | J | -3.72  |
| SPy1722 | -              | putative ribosomal protein                                                  | J | -3.21  |
| SPy1723 | -              | conserved hypothetical protein                                              | K | -3.03  |
| SPy1724 | <i>nusA</i>    | transcription termination-antitermination factor                            | K | -4.36  |
| SPy1725 | -              | conserved hypothetical protein                                              | S | -7.92  |
| SPy1726 | -              | conserved hypothetical protein                                              | R | -2.34  |
| SPy1727 | -              | conserved hypothetical protein                                              | M | -2.10  |
| SPy1729 | -              | putative ABC transporter (ATP-binding protein)                              | V | -2.34  |
| SPy1746 | <i>fabZ</i>    | putative beta-hydroxyacyl-ACP dehydratase                                   | I | -2.08  |
| SPy1753 | <i>acpP</i>    | putative acyl carrier protein                                               | I | -2.37  |
| SPy1761 | <i>grpE</i>    | putative Hsp-70 cofactor                                                    | O | -5.21  |
| SPy1763 | <i>hrcA</i>    | putative heat shock transcription repressor protein                         | K | -4.97  |
| SPy1811 | <i>scrK</i>    | putative fructokinase                                                       | K | -4.03  |
| SPy1813 | -              | hypothetical protein                                                        | - | -11.58 |

|         |               |                                                                             |   |         |
|---------|---------------|-----------------------------------------------------------------------------|---|---------|
| SPy1815 | <i>scrA</i>   | putative sucrose-specific PTS permease, enzyme II                           | G | -8.74   |
| SPy1816 | <i>scrB</i>   | putative sucrose-6-phosphate hydrolase                                      | G | -2.84   |
| SPy1817 | <i>scrR</i>   | putative sucrose operon repressor                                           | K | -3.67   |
| SPy1840 | -             | hypothetical protein                                                        | - | -2.03   |
| SPy1852 | -             | hypothetical protein                                                        | - | -3.07   |
| SPy1869 | <i>udp</i>    | putative uridine phosphorylase                                              | F | -2.25   |
| SPy1874 | -             | putative glycoprotein endopeptidase                                         | O | -2.75   |
| SPy1886 | <i>asp</i>    | putative alkaline-shock protein                                             | S | -2.12   |
| SPy1888 | <i>rpmB</i>   | 50S ribosomal protein L28                                                   | J | -5.17   |
| SPy1895 | <i>rpoE</i>   | putative DNA-directed RNA polymerase (delta subunit)                        | K | -2.53   |
| SPy1898 | -             | conserved hypothetical protein                                              | S | -2.93   |
| SPy1899 | -             | conserved hypothetical protein                                              | S | -2.76   |
| SPy1900 | <i>thiD</i>   | putative phosphomethylpyrimidine kinase                                     | H | -2.80   |
| SPy1901 | <i>truA</i>   | putative tRNA pseudouridine synthase A (pseudouridylylase)                  | J | -2.27   |
| SPy1911 | <i>salY</i>   | putative ABC transporter (permease) associated with salivaricin lantibiotic | V | -2.50   |
| SPy1914 | <i>salB</i>   | putative salivaricin A modification enzyme; amino acid dehydration          | V | -4.86   |
| SPy1923 | <i>lacA.2</i> | galactosidase acetyltransferase                                             | G | -3.30   |
| SPy1924 | <i>lacR.2</i> | putative lactose phosphotransferase system repressor protein                | K | -2.43   |
| SPy1926 | -             | hypothetical protein                                                        | - | -2.01   |
| SPy1940 | -             | conserved hypothetical proteins                                             | S | -3.07   |
| SPy1958 | <i>def</i>    | putative polypeptide deformylase                                            | J | -2.15   |
| SPy1959 | -             | conserved hypothetical protein                                              | R | -2.28   |
| SPy2013 | -             | transposase - IS1562                                                        | L | -2.03   |
| SPy2023 | -             | hypothetical protein (Mga-associated)                                       | - | -2.60   |
| SPy2025 | <i>isp</i>    | immunogenic secreted protein precursor                                      | R | -2.53   |
| SPy2026 | -             | putative histidine kinase                                                   | T | -4.00   |
| SPy2027 | -             | putative two-component response regulator                                   | T | -4.89   |
| SPy2029 | -             | putative ABC transporter (ATP-binding protein)                              | V | -4.90   |
| SPy2031 | -             | putative ABC transporter (ATP-binding protein)                              | V | -10.41  |
| SPy2032 | -             | putative ATP-binding cassette transporter-like protein                      | M | -12.00  |
| SPy2033 | -             | hypothetical protein                                                        | - | -10.95  |
| SPy2037 | -             | conserved hypothetical                                                      | O | -36.50  |
| SPy2039 | <i>speB</i>   | pyrogenic exotoxin B                                                        | - | -130.54 |
| SPy2040 | -             | hypothetical protein                                                        | - | -77.51  |
| SPy2043 | <i>mf</i>     | mitogenic factor                                                            | - | -3.17   |
| SPy2052 | -             | putative PTS system, enzyme III                                             | G | -3.73   |
| SPy2053 | -             | putative transcriptional regulator                                          | K | -3.33   |
| SPy2105 | <i>nrdG</i>   | putative anaerobic ribonucleotide reductase activator                       | O | -2.16   |
| SPy2112 | -             | conserved hypothetical protein                                              | S | -2.79   |
| SPy2113 | -             | conserved hypothetical protein                                              | L | -3.55   |
| SPy2114 | -             | hypothetical protein                                                        | S | -3.28   |
| SPy2115 | -             | conserved hypothetical proteins                                             | P | -2.26   |
| SPy2152 | -             | conserved hypothetical protein                                              | - | -2.59   |
| SPy2159 | <i>rpmF</i>   | 50S ribosomal protein L32                                                   | J | -2.12   |
| SPy2169 | -             | conserved hypothetical protein                                              | S | -6.73   |
| SPy2177 | -             | putative transcriptional regulator (TetR/AcrR family)                       | K | -3.08   |
| SPy2181 | -             | hypothetical protein                                                        | S | -2.40   |
| SPy2186 | -             | hypothetical protein                                                        | L | -2.31   |
| SPy2204 | <i>recF</i>   | RecF protein                                                                | L | -4.17   |

<sup>1</sup>SPy numbers are assigned based on genome of serotype M1 GAS strain SF370.

<sup>2</sup>Assignment based on annotation of serotype M1 GAS strain SF370 ORFs (<http://www.ncbi.nlm.nih.gov/genomes/altik.cgi?gi=178&db=Genome>).

<sup>3</sup>Cluster of Orthologous Groups (<http://www.ncbi.nlm.nih.gov/sutils/coxik.cgi?gi=178>)

<sup>4</sup>Average of a data set consisting of 18 total microarray hybridizations with 2 independently prepared RNA samples. The values here fulfilled the following criteria: the estimated false discovery rate at the 90th percentile in SAM (Significance Analysis of Microarrays) analysis was  $\leq 0.1\%$ , and the fold-change value was at least  $\pm 2.0$ .
